# Supplementary material for: Multidomain Social Determinants of Depressive Symptoms for the Elderly with Chronic Diseases: Evidence from the China Health and Retirement Longitudinal Study
Source: Healthcare (Basel). 2021 Dec 20;9(12):1765. doi: 10.3390/healthcare9121765 (PMC8701898; doi:10.3390/healthcare9121765)
Supplement: Supplementary file 1 [file healthcare-09-01765-s001.zip › healthcare-1482342-supplementary.pdf]

**Supplemental Table S1: Definitions and variable construction of social determinants, by domain**

| Domain                                                                                                                                                                                                   | Variables                                                         | Measurements                                                                                                                                                                                                                                                                                                    |
|----------------------------------------------------------------------------------------------------------------------------------------------------------------------------------------------------------|-------------------------------------------------------------------|-----------------------------------------------------------------------------------------------------------------------------------------------------------------------------------------------------------------------------------------------------------------------------------------------------------------|
| <b>Demographic:</b> The specific demographic characteristics of populations that convey risk for, or protection from, mental illness                                                                     | Gender (male/female)                                              | Sex reported by respondents                                                                                                                                                                                                                                                                                     |
|                                                                                                                                                                                                          | Age (integer)                                                     | Age reported by respondents                                                                                                                                                                                                                                                                                     |
|                                                                                                                                                                                                          | Marital status (married/ others)                                  | Current marital status reported by respondents                                                                                                                                                                                                                                                                  |
| <b>Economic:</b> Factors relating to the production, consumption, and transfer of wealth that convey risk for, or protection from, mental illness                                                        | Annual income ( < 20000/ $\geq$ 20000)                            | Total income including wage, bonus, pensions, unemployment compensation and other types of income respondents received in the past year                                                                                                                                                                         |
|                                                                                                                                                                                                          | Working status (yes/no)                                           | Did you work for at least one-hour last week                                                                                                                                                                                                                                                                    |
| <b>Neighborhood:</b> Characteristics of a community that convey risk for, or protection from, mental illness, over and above what is attributable to the individual characteristics of community members | Residence (urban/rural)                                           | Respondent's residential area                                                                                                                                                                                                                                                                                   |
|                                                                                                                                                                                                          | Access to physical examination (yes/no)                           | Have you participated in the physical examination in the last two years                                                                                                                                                                                                                                         |
| <b>Environmental events:</b> Serious disruptions of the functioning of a community that exceed its ability to cope by use of its own resources and convey risk for mental illness                        | Working age ( < 18/ $\geq$ 18)                                    | At what age did you start working (or farming)                                                                                                                                                                                                                                                                  |
|                                                                                                                                                                                                          | Disability experience (yes/no)                                    | Do you have physical disabilities now or in the past                                                                                                                                                                                                                                                            |
| <b>Social and cultural:</b> ways in which the organization of society, social interactions, and relationships affect risk of, and protection from, mental illness                                        | Education (illiteracy/ elementary school/ Middle school or above) | What's the highest level of education you have attained now                                                                                                                                                                                                                                                     |
|                                                                                                                                                                                                          | Living in family house (yes/no)                                   | Do you live in family house                                                                                                                                                                                                                                                                                     |
|                                                                                                                                                                                                          | Number of social security (none/one/two or above)                 | Any social security the respondents were covered including retirement pension, public old-age insurance, commercialized old age insurance, public free medical services, medical insurance for urban workers and residents, the new rural cooperative medical insurance, commercial medical insurance and other |
